# Supplementary material
Source: PubMed Central journal article supplement (PMC4514539)
Supplement: NIHMS697051-supplement-Supplemental_figures.pdf [file NIHMS697051-supplement-Supplemental_figures.pdf]

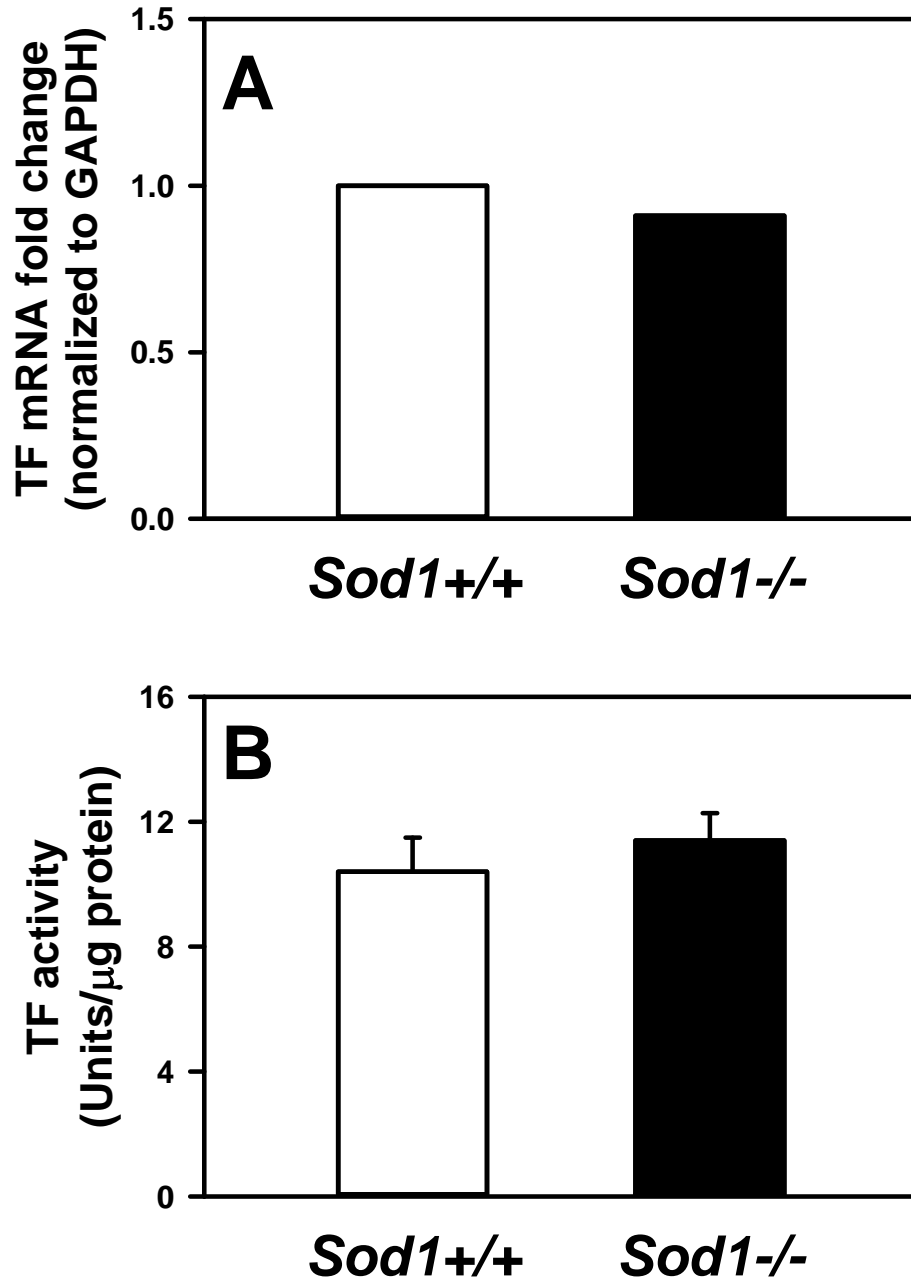

**Supplemental Figure I. Deficiency of SOD1 does not influence TF mRNA expression or activity in mice.** (A) TF mRNA levels in lung homogenates were determined by qRT-PCR and normalized to GAPDH, and data are displayed as fold-change relative to control (*Sod1*<sup>+/+</sup> mice). Comparisons of normalized expression values ( $\Delta$ Ct) employed the conventional  $\Delta\Delta$ Ct fold change method. Ct values:  $24.46 \pm 0.09$  for *Sod1*<sup>+/+</sup> vs.  $24.21 \pm 0.07$  for *Sod1*<sup>-/-</sup> mice.  $P = 0.3$  vs. *Sod1*<sup>+/+</sup> mice ( $n = 5$  to  $6$  mice per group). (B) TF activity in lung homogenates was determined using a TF chromogenic activity assay. Data were quantified based on a TF standard curve. Values are mean  $\pm$  SEM;  $P = 0.5$  ( $n = 4$  mice per group).

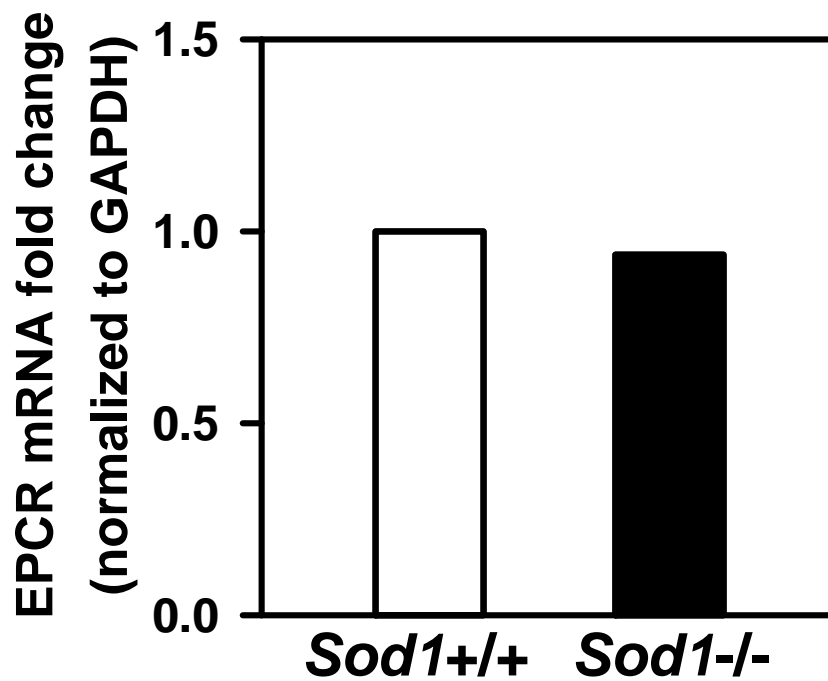

**Supplemental Figure II. Deficiency of SOD1 does not alter mRNA levels of EPCR.** EPCR mRNA levels in lung were determined by qRT-PCR. Levels of mRNA were normalized to GAPDH, and data are displayed as fold-change relative to control (*Sod1*<sup>+/+</sup> mice). Comparisons of normalized expression values ( $\Delta\Delta\text{Ct}$ ) employed the conventional  $\Delta\Delta\text{Ct}$  fold change method. The Ct values for EPCR were  $24.34 \pm 0.14$  in *Sod1*<sup>+/+</sup> vs.  $24.16 \pm 0.28$  in *Sod1*<sup>-/-</sup> mice.  $P = 0.6$  vs. *Sod1*<sup>+/+</sup> mice (n = 5 to 6 mice per group).

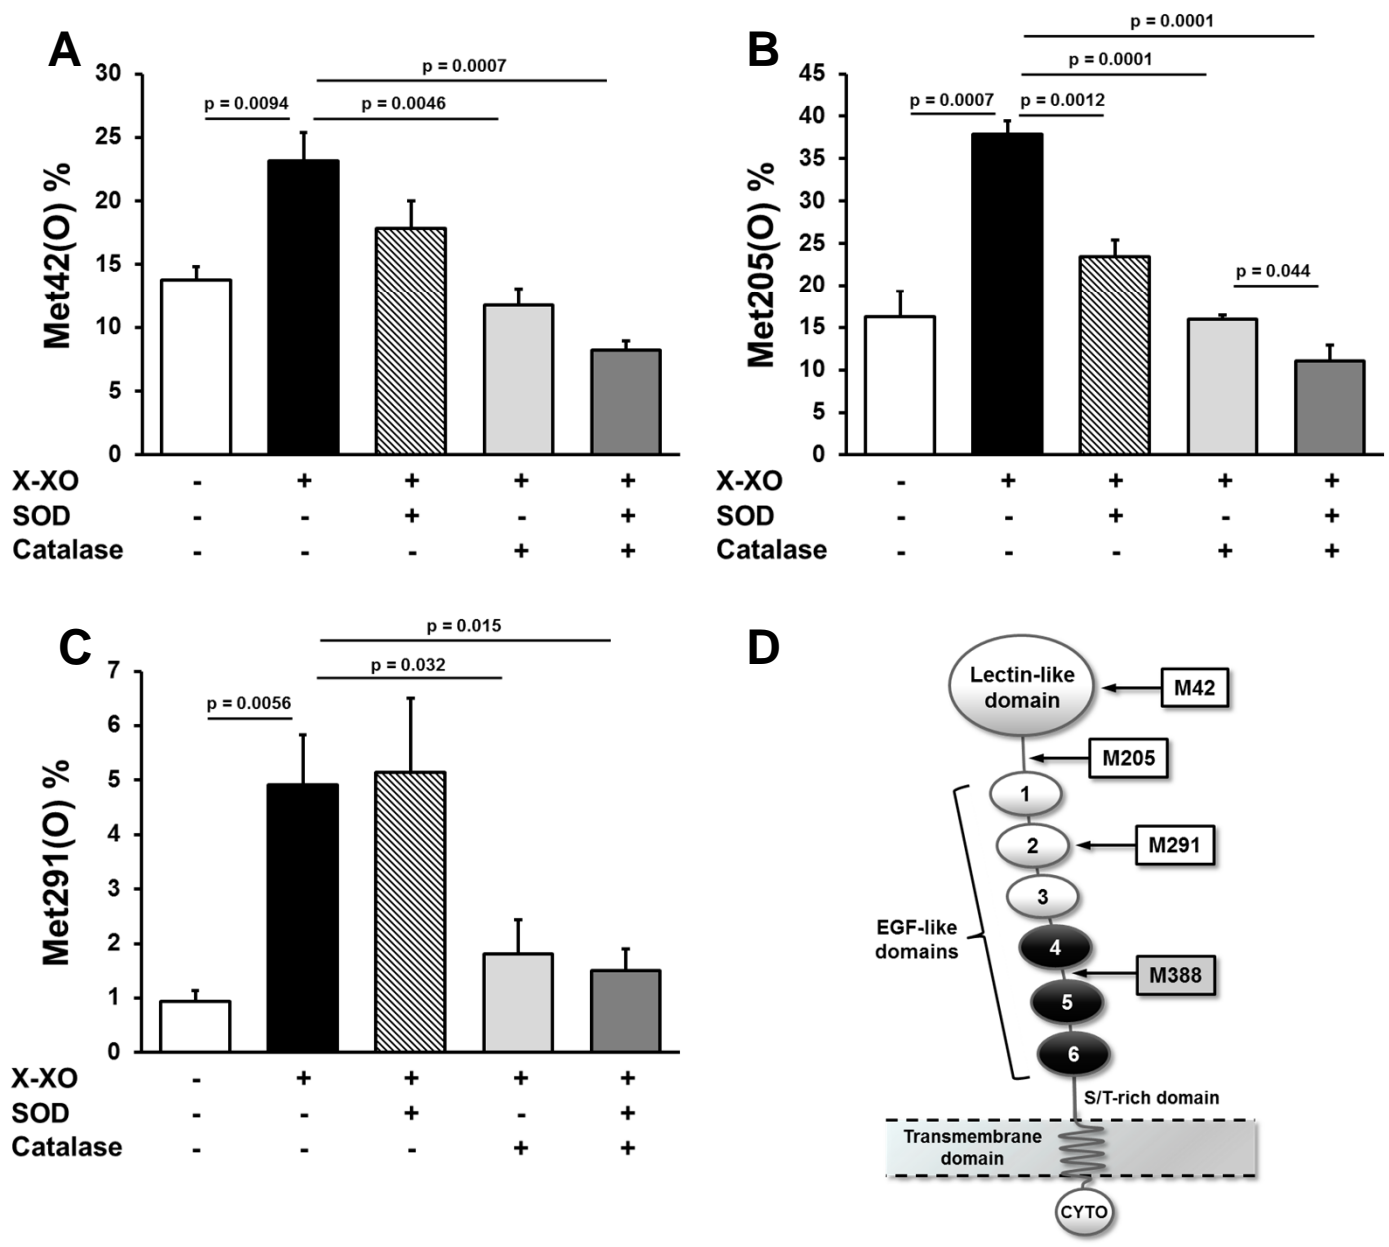

**Supplemental Figure III. Superoxide-induced oxidation of TM Met42, Met 205, and Met291.**

Recombinant human TM was incubated with or without 5 mU/ml xanthine oxidase and 1 mM hypoxanthine (X-XO) in the presence or absence of 50 U/ml PEG-SOD and/or 250 U/ml PEG-catalase. The content of (A) Met42(O), (B) Met205(O), and (C) Met291(O) was determined by nano-LC-MS/MS (n=4). \*P < 0.05 vs. untreated control, † P < 0.05 vs. X-XO treatment, # P < 0.05 vs. PEG-catalase only. (D) Schematic representation of TM domain structure. The extracellular portion of TM contains a lectin-like domain, six epidermal growth factor (EGF)-like domains, and a serine/threonine (S/T)-rich domain. The region of TM involved in thrombin binding and protein C activation are EGF-like domains 4, 5, and 6. The location of the four extracellular methionine residues are indicated (arrows) with the redox active regulatory methionine 388 (M388) highlighted. TM also contains a transmembrane domain and a cytoplasmic tail (CYTO).
